1 **Sleep, regional grey matter volumes, and psychological functioning in adolescents**

2 Adolescent sleep, brain structure, and function

3

4 Winok Lapidaire<sup>1&</sup>, Anna S. Urrila<sup>1,2,3&</sup>, Eric Artiges<sup>1,4</sup>, Ruben Miranda<sup>1</sup>, H el ene Vulser<sup>1</sup>,  
5 Pauline B ezivin-Frere<sup>1</sup>, Herv e Lema tre<sup>1</sup>, Jani Penttil a<sup>1,5</sup>, Tobias Banaschewski<sup>6</sup>, Arun L.W.  
6 Bokde<sup>7</sup>, Uli Bromberg<sup>8</sup>, Christian B uchel<sup>8</sup>, Patricia J. Conrod<sup>9,10</sup>, Sylvane Desrivieres<sup>9,11</sup>,  
7 Vincent Frouin<sup>12</sup>, J urgen Gallinat<sup>13</sup>, Hugh Garavan<sup>7,14</sup>, Penny Gowland<sup>15</sup>, Andreas Heinz<sup>13</sup>,  
8 Bernd Ittermann<sup>13</sup>, Dimitri Papadopoulos-Orfanos<sup>12</sup>, Tom a s Paus<sup>16</sup>, Michael N. Smolka<sup>17</sup>,  
9 Gunter Schumann<sup>7,11</sup>, Marie-Laure Paill ere Martinot<sup>1,18</sup>, and Jean-Luc Martinot<sup>1,19\*</sup>, for the  
10 IMAGEN consortium<sup>+</sup>

11

12 \* Corresponding author

13 Email: [jean-luc.martinot@inserm.fr](mailto:jean-luc.martinot@inserm.fr)

14

15 & These authors contributed equally to this work

16

17

18 **Word count main text: 2954**

19 **Reference count: 40**

20 **Conflict of interest:** There is no conflict of interest for any of the authors involved

21 **Author contributions:**

22 Winok Lapidaire: data analysis, writing, editing

23 Anna S. Urrila et al: writing, editing

24 Others: Editing

25 Imagen cohort: data collection

26

27 <sup>1</sup> National Institute of Health and Medical Research, INSERM Unit 1000 ; “Neuroimaging &  
28 Psychiatry”, University Paris Saclay, University Paris Descartes, Paris, France;

29 <sup>2</sup> National Institute for Health and Welfare, Department of Health, Unit of Mental Health,  
30 Helsinki, Finland;

31 <sup>3</sup> University of Helsinki and Helsinki University Central Hospital, Department of Psychiatry /  
32 Adolescent Psychiatry, Helsinki, Finland;

33 <sup>4</sup> Department of Psychiatry 91G16, Orsay Hospital, Orsay, France;

34 <sup>5</sup> Adolescent Psychiatry Department, Medical school, Tampere University, Tampere, Finland;

35 <sup>6</sup> Central Institute of Mental Health, Medical Faculty Mannheim, Heidelberg University,  
36 Mannheim, Germany;

37 <sup>7</sup> Institute of Neuroscience, Trinity College Dublin, Dublin, Ireland;

38 <sup>8</sup> University Hospital Hamburg Eppendorf, Hamburg, Germany;

39 <sup>9</sup> Institute of Psychiatry, Psychology and Neuroscience, King’s College London, London, United  
40 Kingdom

41 <sup>10</sup> Department of Psychiatry, University of Montreal, CHU Ste Justine Hospital, Montréal,  
42 Canada;

43 <sup>11</sup> MRC Social, Genetic and Developmental Psychiatry (SGDP) Centre, London, United  
44 Kingdom;

45 <sup>12</sup> Neurospin, Commission for Atomic and Alternative Energy, Saclay, France;

46 <sup>13</sup> Department of Psychiatry and Psychotherapy, Campus Charité Mitte, Charité – University  
47 Medical Centre Berlin, Germany;

48 <sup>14</sup> Departments of Psychiatry and Psychology, 6436 UHC, University of Vermont., Burlington,  
49 VT, USA;

50 <sup>15</sup> Sir Peter Mansfield Magnetic Resonance Centre, University of Nottingham, Nottingham,  
51 United Kingdom;

52 <sup>16</sup> Bloorview Research Institute, Holland Bloorview Kids Rehabilitation Hospital and  
53 Departments of Psychology and Psychiatry, University of Toronto, Canada;

54 <sup>17</sup> Department of Psychiatry and Psychotherapy, Technical University Dresden, Germany;

55 <sup>18</sup> APHP, Department of Child and Adolescent Psychiatry, Pitié-Salpêtrière Hospital, Paris,  
56 France

57 <sup>19</sup> CENIR at ICM Institute, Centre of Neuroimaging Research, ICM building, Paris Cedex,  
58 France

59

60

61 **+ Imagen Consortium other collaborators:**

62 M Fauth-Bühler, L Poutska, F Nees, Y Grimmer, M Struve from Central Institute of Mental  
63 Health, Mannheim, Germany;

64 A Ströhle, V Kappel , B M van Noort, from Charité hospital, Berlin, Germany;

65 N Bordas, Z Bricaud, I Filippi, A Galinowski, F Gollier-Briant, Vincent Ménard, from INSERM,  
66 France;

67 A Cattrell, R Goodman, A Stringaris, C Nymberg, L Reed, from the Institute of Psychiatry,  
68 Psychology & Neuroscience, King's College London, United Kingdom;

- 69 B Ittermann, R Brühl R, from Physikalisch-Technische Bundesanstalt (PTB), Berlin; Germany;
- 70 T Hübner, K Müller, from University of Dresden, Germany;
- 71 U Bromberg, J Gallinat, T Fadai, from University of Hamburg, Germany;
- 72 P Gowland, C Lawrence, from University of Nottingham, United Kingdom;
- 73

## 74 **Abstract**

75 Changing sleep rhythms in adolescents often lead to sleep deficits and increased variability in  
76 sleep schedules. The adolescent brain, and in particular the rapidly developing structures  
77 involved in emotional control, are vulnerable to external and internal factors. In our previous  
78 study in adolescents at age 14, we observed a strong relationship between weekend sleep  
79 schedules and regional medial prefrontal cortex grey matter volumes. Here, we aimed to assess  
80 whether this relationship remained in this group of adolescents of the general population at the  
81 age of 16 (n=101; mean age 16.8 years; 55% girls). We further examined grey matter volumes in  
82 the hippocampi and the amygdalae, calculated with voxel-based morphometry. In addition, we  
83 investigated the relationship between regional grey matter volumes with psychological  
84 functioning. Sleep was assessed with self-reports and psychological functioning with the  
85 Strengths and Difficulties Questionnaire and tests on working memory and impulsivity. Later  
86 weekend wake-up times were associated with smaller grey matter volumes in the medial  
87 prefrontal cortex and the amygdalae, and greater weekend delays in wake-up time were  
88 associated with smaller grey matter volumes in the right hippocampus and amygdala. The medial  
89 prefrontal cortex region mediated the correlation between weekend wake up time and both  
90 externalising and internalising symptoms. Paying attention to regular sleep habits during  
91 adolescence could act as a protective factor against the emergence of psychopathology via  
92 enabling favourable brain development.

93

94

95

96 **Abbreviations:** Anatomical Automatic Labeling (AAL); Alcohol Use Disorders Identification  
97 Test (AUDIT); Cambridge Automated Neuropsychological Test Battery (CANTAB); Family  
98 Wise Error (FWE); Magnetisation Prepared Rapid Acquisition Gradient Echo (MPRAGE);  
99 Medial Prefrontal Cortex (mPFC); Montreal Neurologic Institute (MNI); functional Magnetic  
100 Resonance Imaging (fMRI); Region Of Interest (ROI); Statistical Parametric Mapping (SPM);  
101 Strengths and Difficulties Questionnaire (SDQ); Voxel-Based Morphometry (VBM); Weekday  
102 (WD); Weekend (WE);

## 103 **Introduction**

104 Sleep problems and psychiatric disorders increase sharply hand in hand during adolescence, but  
105 our understanding of the potential neurobiological links between them is only emerging (1).

106 Late sleep, sleep deprivation, and social jet lag (the variability of sleep patterns between  
107 weekdays and weekends) have all been associated with a broad range of negative mental health  
108 consequences, including increased depressive and anxiety symptoms, increased risk-taking  
109 behaviours, as well as deteriorated executive function (2–4). Furthermore, sleep disturbances  
110 seem to precede the onset of diverse psychiatric disorders (5).

111  
112 These studies support the theory that unhealthy sleep habits could affect the developing  
113 adolescent brain structure and thereby increase the vulnerability to various kinds of  
114 psychopathologies, but few studies on the relationship between adolescents' sleep habits and  
115 brain grey matter volumes have been published to date. In a sample of maltreated teenagers,  
116 reduced sleep efficiency was recently found to correlate with reduced GMV in hippocampus,  
117 inferior frontal gyrus and insula, suggesting that sleep might mediate the negative impact of  
118 adverse life events on brain morphology (6). In a mixed sample of children and adolescents,  
119 weekday time in bed was found to correlate with regional grey matter volumes of the bilateral  
120 hippocampi and the dorsolateral prefrontal cortex (7). In our previous study of 14-year-old  
121 adolescents, we found late sleep during the weekend and short sleep during the week to be  
122 associated with smaller regional grey matter volumes, particularly in the medial prefrontal cortex  
123 (mPFC). In addition, there was a correlation between mPFC GMV and school performance (8).  
124 Since sleep characteristics and brain morphology undergo constant changes through adolescence

125 (9,10), it is important to study their interconnections repeatedly at different points of  
126 development.

127  
128 The mPFC exerts an inhibitory top-down control of subcortical structures (11). Poor sleep and  
129 eveningness-prone or irregular sleep rhythms can negatively affect adolescents' emotion  
130 regulation, reward-related processing, and impulse inhibition by influencing the mPFC (12–14)  
131 as well as the amygdala and the hippocampus (15–19). These structures have also been  
132 implicated in the etiology and maintenance of psychiatric disorders (20,21). Studying the effects  
133 of sleep especially on the mPFC, the amygdala, and the hippocampus would thus crucially  
134 contribute to understanding the development of psychopathology during adolescence. Our  
135 general hypothesis is that adolescents' sleep patterns affect brain regional grey matter volumes,  
136 which in turn lead to lower psychological functioning or even mild psychopathology.  
137 Understanding the trajectories that lead toward psychiatric disorders as early as possible in  
138 development would allow us to develop effective intervention and prevention strategies.

139  
140 In this follow-up study we aimed to assess whether our previous findings on the correlation  
141 between adolescents' sleep habits and brain grey matter volumes remained present at the age of  
142 16, and to extend these findings by examining their relationships with psychological functioning.

143

## 144 **Methods**

### 145 **Participants**

146 Participants were recruited from schools near Paris, France, based on their age and absence of  
147 any major somatic condition. Written consent was obtained from all subjects in this study. The



148 study was approved by the regional ethics committee (Comité de Protection des Personnes [CPP]  
149 Ile-de-France 7). The adolescents participated in a larger multi-centre study ([http://www.imagen-](http://www.imagen-europe.com/en/the-imagen-study.php)  
150 [europe.com/en/the-imagen-study.php](http://www.imagen-europe.com/en/the-imagen-study.php)) (22) at age 14 (baseline), and were followed up at age 16.  
151 Only the French adolescents were assessed for their sleep habits and were thus eligible for this  
152 study. Details of the sample at baseline have been previously reported (8). This study focuses on  
153 the sample at age 16, at which time point written informed assent and consent to study  
154 participation were obtained from a total of 138 adolescents and their parents, respectively. We  
155 excluded participants who did not complete the sleep questionnaires, those whose Magnetic  
156 Resonance brain images did not pass the quality control of the raw or the segmented images,  
157 participants with brain lesions, and those with marked alcohol consumption (alcohol use  
158 disorders identification test (AUDIT) total score >7 (23). In this study, we present data from the  
159 remaining 101 adolescents (mean age =16.83 years, SD=0.61; 56 girls; Table 1). At the time of  
160 the study, none of the participants were followed in the psychiatric care system and all  
161 participants were attending school regularly.

162

163 **Table 1. Clinical, behavioral characteristics, and brain volumes in community adolescents at age 16**

| Variable                             |                                  | Mean or %          | SD     |
|--------------------------------------|----------------------------------|--------------------|--------|
| <b>Demographic variables</b>         | Age (years)                      | 16.83              | 0.61   |
|                                      | Gender                           | 55 % (n=56) female |        |
| <b>Sleep variables (N=101)</b>       | Wake up time WD                  | 7:03               | 0:43   |
|                                      | Wake up time WE                  | 10:01              | 1:15   |
|                                      | Bedtime WD                       | 22:42              | 0:43   |
|                                      | Bedtime WE                       | 00:05              | 1:10   |
|                                      | Difference wake up time WE-WD    | 2:59               | 1:17   |
|                                      | Difference bedtime WE-WD         | 1:23               | 1:04   |
|                                      | Time in bed WD                   | 8:18               | 0:59   |
|                                      | Time in bed WE                   | 9:56               | 1:00   |
|                                      | Difference time in bed WE-WD     | 1:40               | 0:59   |
| <b>Performance scores (N=82)</b>     | Delay discounting large amounts  | -2.25              | 0.68   |
|                                      | Delay discounting medium amounts | -2.03              | 0.73   |
|                                      | Delay discounting geomean        | -2.06              | 0.66   |
|                                      | Spatial working memory           | 7.59               | 7.80   |
| <b>Behavioural problems (N=74)</b>   | SDQ internalising                | 4.34               | 2.40   |
|                                      | SDQ externalising                | 7.36               | 2.68   |
| <b>Global brain measures (N=101)</b> | Total grey matter volume         | 742.02             | 68.99  |
|                                      | Total white matter volume        | 477.22             | 49.28  |
|                                      | Total CSF                        | 395.55             | 40.89  |
|                                      | Volume scaling factor            | 1.32               | 148.21 |

164 *WD = weekday; WE = weekend; CSF = cerebrospinal fluid.*

165

166

## 167 **Sleep assessments**

168 Sleep habits were assessed by asking the adolescents their usual bedtimes and wake up times  
169 during weekdays (WD) and weekends (WE). Time in bed was approximated by calculating the  
170 number of hours between bedtime and wake up time, separately for WD and WE. WE delay in  
171 sleep timing (“social jet lag”) and weekly sleep debt was defined as the difference between  
172 weekday and weekend in sleep times and time in bed.

173

174

## 175 **Psychological functioning**

176 Symptom assessment was performed using the Strengths and Difficulties Questionnaire (SDQ)  
177 (24), a child and adolescent self-report questionnaire used to identify internalising and  
178 externalising problems. It consists of 25 items, five items for each subscale: conduct problems,  
179 hyperactivity, emotional problems, peer problems, and prosocial behaviour. The items are scored  
180 0 to 2, reflecting the answers “not true”, “somewhat true” or “certainly true”. The scores are then  
181 summed, generating five scale scores ranging from 0 to 10 with higher scores reflecting more  
182 problems in the first four scales or more prosocial behaviour in the last scale. In low-risk  
183 samples, conduct problems and hyperactivity are best combined into an ‘externalising’ subscale,  
184 and emotional problems and peer problems into an ‘internalising’ subscale (25).

185

186 Other behavioural measures included the Kirby Delay-Discounting Questionnaire (26), a  
187 monetary choice questionnaire assessing cognitive impulsivity through delay discounting by  
188 having participants choose between smaller immediately available rewards and larger delayed  
189 rewards, and the spatial working memory task, a subtest of the computer-administrated

190 Cambridge Automated Neuropsychological Test Battery (CANTAB) measuring executive  
191 functioning (27). The spatial working memory test has been widely used in typically developing  
192 and clinical populations of children and adolescents (28). The error score was used as the  
193 outcome variable.

194

## 195 **MRI data acquisition and processing**

196 MRI was performed on a 3T scanner (Siemens Trio). High-resolution anatomical MR images  
197 were obtained using a standardised 3D T1-weighted magnetisation prepared rapid acquisition  
198 gradient echo (MPRAGE) sequence based on the ADNI protocol  
199 (<http://adni.loni.usc.edu/methods/mri-analysis/mri-acquisition/>). The parameters were as follows:  
200 repetition time=2,300 ms, echo time=2.8 ms, flip angle=8°, 256x256x170 matrix, 1.1x1.1x1.1  
201 mm voxel size.

202

203 The images were processed using Statistical Parametric Mapping 8 (SPM 8) using Voxel-Based  
204 Morphometry (VBM) (29). The “unified segmentation” algorithm was used to normalise and  
205 segment the T1-weighted images into grey matter, white matter and cerebrospinal fluid. Home-  
206 made tissue probability maps were used instead of the standard template of SPM based on fully  
207 grown and developed brains of adults, who have larger brain volumes. The modulated images  
208 were smoothed with a 10-mm full-width at half-maximum isotropic Gaussian kernel. Head size  
209 was measured by the volume scaling factor, which is based on the affine transformation  
210 performed during spatial normalisation (<https://surfer.nmr.mgh.harvard.edu/fswiki/eTIV>).

211

## 212 **Statistical analyses**

213 The outcome measures for the Kirby Delay-Discounting Questionnaire were calculated using an  
214 automated calculator (30). A logistic regression that allowed for continuous estimates of  $k$  (31),  
215 and a logarithmic transformation to normalise the distribution of  $k$ -values were applied. The  
216 geometric mean of the  $k$ -values is bounded by the lowest implied indifference  $k$ -value at which  
217 subjects chose the larger delayed reward and the highest indifference  $k$ -value at which the  
218 subject chooses the immediate reward.

219

220 Correlations were performed with a Pearson correlation test, applying case-wise deletion for  
221 missing values. Group comparisons for socio-demographic and clinical data, and global brain  
222 volumes were performed within the framework of the general linear model (GLM) using R  
223 software (<http://cran.r-project.org>). Voxel-wise comparisons were carried out within the GLM  
224 framework of SPM8. Sleep variables were the main factors while age, gender and volume  
225 scaling factor were entered as confounding variables. Alpha was set for 0.05 in all tests.

226

227 *A priori* masks were used to examine the hippocampus, amygdala, and medial prefrontal region  
228 with a region of interest (ROI) approach. The hippocampus and amygdala masks were created  
229 with the Anatomical Automatic Labeling (AAL) atlas in SPM. The medial prefrontal region was  
230 marked with a 10 mm radius from coordinates [-2, 34, -14] taken from our previous results on an  
231 analogous sample at age 14, which indicated a strong relationship between sleep habits and  
232 GMV in this region (8). Subsequently, it was investigated whether psychometrics measures  
233 (spatial working memory, delay discounting, internalising and externalising problems) were  
234 associated with grey matter volumes in these regions of interest.

235

236 At the voxel-level, statistical significance was set to  $p < 0.05$  FWE (Family Wise Error) corrected  
237 for multiple comparisons. Brain locations were reported as x, y, and z coordinates in Montreal  
238 Neurologic Institute (MNI) space.

239

240 In addition, it was examined whether the sleep times that were significant in the ROI VBM  
241 analyses were correlated with psychological functioning. Subsequently, causal mediation  
242 analyses were performed to determine whether the grey matter clusters could mediate the  
243 relation between sleep and psychological functioning variables. These analyses were performed  
244 if there was a significant relationship between sleep and psychological functioning variables and  
245 GMV of the same ROI.

246

247 The mediation analyses were performed with an algorithm using a set of general linear models to  
248 derive the mediation and direct effects from the total effect (32). The psychological functioning  
249 measures were entered as dependent factor, and sleep variables as independent factor within a  
250 linear regression model. For the mPFC ROI analysis, raw volume was extracted from the  
251 smoothed, normalized, and modulated images and entered as mediator variable. The  
252 hippocampus and amygdala volumes were extracted from the same images using the AAL masks  
253 instead of the significant clusters in order to better approximate the complete volumes. Volume  
254 scaling factor and age were entered as confounding variables. Gender was added for analyses  
255 without a gender interaction between sleep and psychological functioning scores. If there was a  
256 gender effect, we performed the mediation analysis separately for boys and girls. This mediation  
257 model was performed using 5000 Monte Carlo draws for nonparametric bootstrap. In causal

258 mediation analysis, a significant mediating effect is defined as a 95% confidence interval that  
259 does not include zero.

260

## 261 **Results**

### 262 **Participant characteristics**

263 On average, boys went to bed later during the week (boys =  $22.53 \pm 0.47$ , girls =  $22.33 \pm 0.33$ ;  
264  $F(99)=2.41$ ,  $p=0.02$ ) and woke up later during the weekend (mean wake up time: boys= $10.23 \pm$   
265  $1:17$ , girls =  $9:44 \pm 1:10$ ;  $F(99)=2.63$ ,  $p=0.01$ ) as compared to girls. There were no significant  
266 gender differences in any of the other sleep variables, nor in delay discounting, spatial working  
267 memory or internalising and externalising problems (see Table 1 for descriptives).

268

269 Clinically relevant externalising symptoms (SDQ score  $\geq 10$ ), were present in 15 out of 81  
270 adolescents (18.3%) and 10 out of 81 (12.2%) showed clinically relevant internalising symptoms  
271 (score  $\geq 8$ ).

272

### 273 **Sleep and regional grey matter volumes**

274 WE wake up time correlated negatively with GMV in the bilateral amygdalae and the mPFC  
275 (Table 2, Fig 1). WE delay in wake up time ('social jet lag') correlated negatively with GMV in  
276 the right hippocampal region and the right amygdala (Table 2). No other statistically significant  
277 correlations between sleep variables and regional grey matter volumes were found.

278

279 **Table 2. Grey Matter Volume correlations with sleep measures in community adolescents at age 16**  
 280 **using regions-of-interest**

| Brain region                    | Cluster |        | Peak     |       |                      |     |     |
|---------------------------------|---------|--------|----------|-------|----------------------|-----|-----|
|                                 | Size    | p FWE  | T-values | p FWE | coordinates<br>x y z |     |     |
| <b>Wake up weekend</b>          |         |        |          |       |                      |     |     |
| <b>Amygdala</b>                 |         |        |          |       |                      |     |     |
| Amygdala R                      | 237     | 0.018  | 3.51     | 0.011 | 21                   | -6  | -12 |
| Amygdala L                      | 3       | 0.047  | 3.04     | 0.041 | -12                  | -3  | -15 |
| <b>mPFC</b>                     |         |        |          |       |                      |     |     |
|                                 | 203     | 0.029  | 3.11     | 0.02  | 2                    | 42  | -11 |
| <b>Variability wake up time</b> |         |        |          |       |                      |     |     |
| <b>Amygdala</b>                 |         |        |          |       |                      |     |     |
| Amygdala R                      | 51      | 0.0350 | 3.23     | 0.025 | 20                   | -3  | -12 |
| <b>Hippocampus</b>              |         |        |          |       |                      |     |     |
| Hippocampus R                   | 37      | 0.028  | 4.23     | 0.008 | 20                   | -25 | -23 |

281 *Size = number of voxels in cluster; MNI = Montreal neurological Institute coordinates in millimeters; R*  
 282 *= right; L = left. MNI coordinates are given for the voxel of maximal statistical significance. Statistics*  
 283 *significant at the  $p < 0.05$  FWE level; analyses are covaried for volume scale factor, age, and gender.*

284  
 285 **Figure 1. Later wake up time during the weekend was associated with reduced grey matter volumes**  
 286 **in the A) left amygdala and B) mPFC**

## 288 Sleep and psychological functioning

289 WE wake up time and WE delay in waking up correlated with measures of impulsivity as well as  
 290 externalizing and internalizing problems (Table 3).

291  
 292



293 **Table 3. Correlations between sleep variables and psychological functioning in community**  
294 **adolescents at age 16**

|                                      | <b>Wake up time WE</b> | <b>Variability wake up time</b> |
|--------------------------------------|------------------------|---------------------------------|
| <b>Delay discounting large</b>       | $r=0.319^{**}$         | $r=0.292^{**}$                  |
| <b>Delay discounting medium</b>      | $r=0.217$              | $r=0.194$                       |
| <b>Delay discounting geomean</b>     | $r=0.265^*$            | $r=0.247^*$                     |
| <b>SDQ externalising</b>             | $r=0.511^{**}$         | $r=0.643^{**}$                  |
| <b>SDQ internalising</b>             | $r=-0.229$             | $r=-0.327^{**}$                 |
| <b>Spatial working memory errors</b> | $r=0.093$              | $r=0.116$                       |

295  $^*=p<0.05$ ,  $^{**}=p<0.01$ ,  $^{***}=p<0.001$

296

## 297 **Grey matter volumes and psychological functioning**

298 Smaller grey matter volumes in the mPFC region were associated with increased delay  
299 discounting ( $T=3.28$ ,  $p<0.01$ ) as well as internalising ( $T=4.99$ ,  $p<0.001$ ) and externalising  
300 ( $T=6.03$ ,  $p<0.001$ ) problems (Table 4). Additionally, smaller grey matter volumes in the  
301 amygdala (most significant cluster  $T=10.57$ ,  $p<0.001$ ), and hippocampal regions ( $T=11.01$ ,  
302  $p<0.001$ ) were associated with internalising problems. There were no other significant relations  
303 between grey matter volumes and psychological functioning measures (Table 4).

304

305

306 **Table 4. Grey matter volumes correlations with psychological functioning in 138 community**  
 307 **adolescents at age 16**

| Psychological functioning        | Amygdala |            | Hippocampus |            | mPFC    |           |
|----------------------------------|----------|------------|-------------|------------|---------|-----------|
|                                  | T-value  | x,y,z      | T-value     | x,y,z      | T-value | x,y,z     |
| <b>Delay discounting large</b>   | -        | -          | -           | -          | 2.97*   | -6,42,-15 |
| <b>Delay discounting medium</b>  | -        | -          | -           | -          | 3.29*   | -8,40,-17 |
| <b>Delay discounting geomean</b> | -        | -          | -           | -          | 3.28**  | -8,40,-17 |
| <b>Spatial Working Memory</b>    | -        | -          | -           | -          | -       | -         |
| <b>SDQ externalising</b>         | -        | -          | -           | -          | 6.03*** | -2,44,-14 |
| <b>SDQ internalising</b>         | 10.57*** | -30,-3,-29 | 11.01***    | -28,-7,-32 | 4.99*** | 4,30,-8   |
|                                  | 4.40***  | 36,0,-24   | 7.34***     | 21,-45,-3  |         |           |
|                                  |          |            | 6.13***     | 40,-15,-23 |         |           |

308 - =no significant results, MNI coordinates and T-values are given for the voxel of maximal statistical  
 309 significance, \*= $p < 0.05$ , \*\*= $p < 0.01$ , \*\*\*= $p < 0.001$

310

### 311 **Mediation analyses**

312 Causal mediation analyses showed that variability in mPFC volumes accounted for 30.5% of the  
 313 total effect between wake up time during the WE and externalising problems, and for 65.2% of  
 314 the total effect between wake up time during the WE and internalising problems (Table 5).

315

316

317 **Table 5. Causal mediation analysis on the relationship between sleep variables and behavioural**  
 318 **problems with medial prefrontal cluster volumes as mediator**  
 319

|                                                  |                | <b>Wake up time WE –<br/>mPFC - SDQ<br/>externalising</b> | <b>Wake up time WE –<br/>mPFC -SDQ<br/>internalising</b> |
|--------------------------------------------------|----------------|-----------------------------------------------------------|----------------------------------------------------------|
| <b>Mediation effect</b>                          | Point estimate | 0.393**                                                   | -0.354***                                                |
|                                                  | 95% CI         | 0.138-0.720                                               | -0.55                                                    |
| <b>Direct effect</b>                             | Point estimate | 0.9**                                                     | -0.176                                                   |
|                                                  | 95% CI         | 0.396-1.393                                               | -0.998                                                   |
| <b>Total effect</b>                              | Point estimate | 1.293**                                                   | -0.53*                                                   |
|                                                  | 95% CI         | 0.776-1.817                                               | -1.004                                                   |
| <b>Proportion total effect<br/>via mediation</b> | Point estimate | 0.305***                                                  | 0.652*                                                   |
|                                                  | 95% CI         | 0.113-0.579                                               | 0.149-3.419                                              |

320 *Point estimate, estimate of the size of the effect; 95% CI, 95% confidence interval of the point estimate*

321 *\*= $p < 0.05$ , \*\*= $p < 0.01$ , \*\*\*= $p < 0.001$*

322

## 323 **Discussion**

324 The present findings confirm and extend our previous findings that sleep patterns in adolescents  
 325 from the general population correlate with regional brain grey matter volumes and psychological  
 326 functioning. In particular, later WE wake up times were associated with smaller GMV in the  
 327 mPFC and the amygdalae. Furthermore, a greater WE delay ('social jetlag') was associated with  
 328 lower grey matter volume in hippocampus and amygdala regions. Regional grey matter volumes  
 329 of the mPFC, amygdala, and hippocampus were associated with cognitive impulsivity and

330 behavioural problems. Causal mediation analyses showed that GMV of the mPFC mediated the  
331 relationship between weekend wake up time and externalising as well as internalising problems.

332  
333 The results corroborate our previous findings in the sample at age 14, which showed an  
334 association between grey matter volumes in the mPFC region and weekend wake-up time (8).  
335 This could indicate that weekend wake up times affect mPFC grey matter maturation throughout  
336 adolescence. The impact of sleep on the brain might be particularly significant and long-lasting  
337 during adolescence because the brain is still in development during this phase (33).

338  
339 The relationship between WE delay ('social jetlag') and grey matter volumes could result from  
340 repeated challenges to the circadian regulatory mechanisms (34). This can be compared with  
341 having regular *mini-jetlags*. A study on the short term effects of jetlag found reduced resting  
342 state activity in the mPFC and the left parahippocampal gyrus as well as other default mode  
343 network regions (35). In accordance with our finding of the association between GMV in the  
344 right hippocampal region and a difference in wake-up time, a study on chronic functional jetlag  
345 reported a relationship between sleep patterns and right temporal lobe atrophy, which included  
346 the parahippocampal gyrus (36). An alternative explanation is that later WE wake up times might  
347 reflect a late-prone biological rhythm rather than a social jetlag. Chronotype has recently been  
348 found to correlate with local GMVs and cortical thickness in a small sample of adult men (37).  
349 However, late bedtimes, another characteristic of a late chronotype, were not related to the  
350 volumes of the regions of interest in our study.

351

352 The results of the current study further show that WE delay and mPFC grey matter volumes are  
353 both significantly associated with cognitive impulsivity as well as internalising and externalising  
354 problems. Since the mPFC is an important brain area for regulation of the limbic structures, it is  
355 plausible that impaired development of this structure due to unhealthy sleep habits can lead to  
356 cognitive and emotional control deficits (16,18,38). This is the first study to show a mediating  
357 role of grey matter volumes in the mPFC in the relationship between sleep and internalising and  
358 externalising symptoms in healthy adolescents.

359  
360 Internalising symptoms were also associated with smaller GMV in bilateral amygdala and  
361 parahippocampal regions. This finding is in accordance with previous research associating  
362 abnormalities in the amygdala, the parahippocampus, and the mPFC with emotional difficulties  
363 (39). Internalising symptoms are predictors of later educational underachievement, mental  
364 disorders, and impaired personal relationships (40). Externalising symptoms and impulsivity are  
365 both related to a host of maladaptive behaviours, including drug abuse, gambling, and poor  
366 academic and work success (41,42).

367  
368 Bedtimes and time in bed were not significantly correlated with grey matter volumes at age 16.  
369 This is in contrast with our previous study in 14-year-old adolescents and a study by Taki and  
370 collaborators (7,8), where weekend bedtimes were associated with smaller mPFC grey matter  
371 volumes, but the sample of these studies consisted of younger children, who have not yet  
372 developed a delay in circadian rhythms and whose time in bed is still much more regulated by  
373 the parents. Therefore, time in bed during the week might be a more important factor in earlier  
374 brain developmental phases, while sleep timing and regularity in sleep timing might be more

375 important later during adolescence. The current results also do not provide evidence of negative  
376 effects of sleep debt, as measured by time in bed difference between WD and WE, on the  
377 adolescent brain. It must be noted, however, that sleep debt could affect brain regions that were  
378 not examined in the current study.

379  
380 The findings could be confounded by the developmental stage of the participants. However, we  
381 used a relatively large sample, drawn from the general population, with a very narrow age range,  
382 making the results less likely to be influenced by confounding factors associated with age and  
383 sampling bias. A limitation of this study is the use of self-report questionnaires to measure sleep  
384 and behavioural problems. Sleep diaries and polysomnographic or actigraphic recordings would  
385 have provided a more objective measure of sleep, and including parental reports could have  
386 completed the picture of behavioural problems in adolescents. As this is a cross-sectional study,  
387 it is difficult to see to which degree sleep habits are a cause or a consequence of reduced grey  
388 matter volumes. We theorise that sleep rhythms influence brain development, which in turn  
389 causes lower functioning. The results of the causal mediation analyses would also favour this  
390 interpretation. However, reduced grey matter volumes might be a pre-existing condition that  
391 contributes to cognitive impulsivity and behavioural problems as well as the development of  
392 specific sleep patterns. Lastly, the ROI approach does not allow exploration of effects of sleep  
393 brain on regions other than the chosen ROIs.

394

## 395 **Conclusion**

396 Overall, the present findings are consistent with and extend our previous report in 14 year-old  
397 adolescents, suggesting that the negative impact of irregularity of sleep schedules on the

398 adolescent brain can result in reduced ability to regulate emotions and impulses. This highlights  
399 the importance of sleep habits in adolescents and supports the recommendation to keep  
400 variability in sleep times to a minimum in order to reduce the risk of psychiatric morbidity.

401

402

403

404

## 405 **References**

- 406 1. Suleiman AB, Dahl RE. Leveraging Neuroscience to Inform Adolescent Health: The Need  
407 for an Innovative Transdisciplinary Developmental Science of Adolescence. *J Adolesc*  
408 *Heal* [Internet]. 2017 Mar 1 [cited 2019 Oct 28];60(3):240–8. Available from:  
409 <https://www.sciencedirect.com/science/article/pii/S1054139X16309569>
- 410 2. Merikanto I, Pesonen A-K, Kuula L, Lahti J, Heinonen K, Kajantie E, et al. Eveningness  
411 as a risk for behavioral problems in late adolescence. *Chronobiol Int* [Internet]. 2017 Feb  
412 7 [cited 2019 Oct 28];34(2):225–34. Available from:  
413 <http://www.ncbi.nlm.nih.gov/pubmed/28055288>
- 414 3. Owens J, Adolescent Sleep Working Group, Committee on Adolescence. Insufficient  
415 Sleep in Adolescents and Young Adults: An Update on Causes and Consequences.  
416 *Pediatrics* [Internet]. 2014 Sep 1 [cited 2019 Oct 28];134(3):e921–32. Available from:  
417 <http://www.ncbi.nlm.nih.gov/pubmed/25157012>
- 418 4. Smaldone A, Honig JC, Byrne MW. Sleepless in America: inadequate sleep and  
419 relationships to health and well-being of our nation’s children. *Pediatrics* [Internet]. 2007  
420 Feb [cited 2019 Oct 28];119 Suppl 1(Supplement 1):S29-37. Available from:  
421 <http://pediatrics.aappublications.org/lookup/doi/10.1542/peds.2006-2089F>
- 422 5. Tesler N, Gerstenberg M, Huber R. Developmental changes in sleep and their  
423 relationships to psychiatric illnesses. *Curr Opin Psychiatry* [Internet]. 2013 Nov [cited  
424 2019 Oct 28];26(6):572–9. Available from:  
425 [http://content.wkhealth.com/linkback/openurl?sid=WKPTLP:landingpage&an=00001504-  
426 201311000-00010](http://content.wkhealth.com/linkback/openurl?sid=WKPTLP:landingpage&an=00001504-201311000-00010)
- 427 6. Teicher MH, Ohashi K, Khan A, Garcia LCH, Klengel T, Anderson CM, et al. Does sleep  
428 disruption mediate the effects of childhood maltreatment on brain structure? *Eur J*  
429 *Psychotraumatol* [Internet]. 2017 [cited 2018 Nov 8];8. Available from:  
430 <https://doi.org/10.1080/20008198.2018.1450594>
- 431 7. Taki Y, Hashizume H, Thyreau B, Sassa Y, Takeuchi H, Wu K, et al. Sleep duration  
432 during weekdays affects hippocampal gray matter volume in healthy children.  
433 *Neuroimage* [Internet]. 2012 Mar [cited 2019 Oct 28];60(1):471–5. Available from:  
434 <https://linkinghub.elsevier.com/retrieve/pii/S1053811911013541>

- 435 8. Urrila AS, Artiges E, Massicotte J, Miranda R, Vulser H, Bézivin-Frere P, et al. Sleep  
436 habits, academic performance, and the adolescent brain structure. *Sci Rep* [Internet]. 2017  
437 Feb 9 [cited 2017 Mar 10];7:41678. Available from:  
438 <http://www.nature.com/articles/srep41678>
- 439 9. Hagenauer MH, Perryman JI, Lee TM, Carskadon MA. Adolescent changes in the  
440 homeostatic and circadian regulation of sleep. *Dev Neurosci* [Internet]. 2009 [cited 2019  
441 May 9];31(4):276–84. Available from: <http://www.ncbi.nlm.nih.gov/pubmed/19546564>
- 442 10. Giedd JN, Lalonde FM, Celano MJ, White SL, Wallace GL, Lee NR, et al. Anatomical  
443 brain magnetic resonance imaging of typically developing children and adolescents. *J Am  
444 Acad Child Adolesc Psychiatry* [Internet]. 2009 May 1 [cited 2019 May 9];48(5):465–70.  
445 Available from: <http://www.ncbi.nlm.nih.gov/pubmed/19395901>
- 446 11. Cho SS, Pellecchia G, Aminian K, Ray N, Segura B, Obeso I, et al. Morphometric  
447 Correlation of Impulsivity in Medial Prefrontal Cortex. *Brain Topogr* [Internet]. 2013 Jul  
448 30 [cited 2019 Oct 28];26(3):479–87. Available from:  
449 <http://link.springer.com/10.1007/s10548-012-0270-x>
- 450 12. Forbes EE, Ryan ND, Phillips ML, Manuck SB, Worthman CM, Moyles DL, et al.  
451 Healthy adolescents' neural response to reward: associations with puberty, positive affect,  
452 and depressive symptoms. *J Am Acad Child Adolesc Psychiatry* [Internet]. 2010 Feb  
453 [cited 2019 Oct 28];49(2):162-72.e1-5. Available from:  
454 <http://www.ncbi.nlm.nih.gov/pubmed/20215938>
- 455 13. Galvan A. Adolescent development of the reward system. *Front Hum Neurosci* [Internet].  
456 2010 [cited 2019 Oct 28];4:6. Available from:  
457 <http://www.ncbi.nlm.nih.gov/pubmed/20179786>
- 458 14. Tashjian SM, Goldenberg D, Galván A. Neural connectivity moderates the association  
459 between sleep and impulsivity in adolescents. *Dev Cogn Neurosci* [Internet]. 2017 Oct  
460 [cited 2019 Oct 28];27:35–44. Available from:  
461 <https://linkinghub.elsevier.com/retrieve/pii/S1878929317301111>
- 462 15. Kreutzmann JC, Havekes R, Abel T, Meerlo P. Sleep deprivation and hippocampal  
463 vulnerability: changes in neuronal plasticity, neurogenesis and cognitive function.  
464 *Neuroscience* [Internet]. 2015 Nov 19 [cited 2019 Oct 28];309:173–90. Available from:  
465 <https://linkinghub.elsevier.com/retrieve/pii/S0306452215003942>
- 466 16. Motomura Y, Kitamura S, Nakazaki K, Oba K, Katsunuma R, Terasawa Y, et al.  
467 Recovery from Unrecognized Sleep Loss Accumulated in Daily Life Improved Mood  
468 Regulation via Prefrontal Suppression of Amygdala Activity. *Front Neurol* [Internet].  
469 2017 Jun 30 [cited 2019 Oct 28];8:306. Available from:  
470 <http://journal.frontiersin.org/article/10.3389/fneur.2017.00306/full>
- 471 17. O'Byrne JN, Berman Rosa M, Gouin J-P, Dang-Vu TT. Neuroimaging findings in  
472 primary insomnia. *Pathol Biol (Paris)* [Internet]. 2014 Oct [cited 2019 Oct 28];62(5):262–  
473 9. Available from: <https://linkinghub.elsevier.com/retrieve/pii/S036981141400087X>
- 474 18. Yoo S-S, Gujar N, Hu P, Jolesz FA, Walker MP. The human emotional brain without  
475 sleep--a prefrontal amygdala disconnect. *Curr Biol* [Internet]. 2007 Oct 23 [cited 2019 Oct  
476 28];17(20):R877-8. Available from:  
477 <https://linkinghub.elsevier.com/retrieve/pii/S0960982207017836>
- 478 19. Robinson JL, Erath SA, Kana RK, El-Sheikh M. Neurophysiological differences in the  
479 adolescent brain following a single night of restricted sleep - A 7T fMRI study. *Dev Cogn  
480 Neurosci* [Internet]. 2018 Jun [cited 2019 Oct 28];31:1–10. Available from:



- 481 <https://linkinghub.elsevier.com/retrieve/pii/S1878929317302530>  
482 20. Hoogman M, Bralten J, Hibar DP, Mennes M, Zwiers MP, Schweren LSJ, et al.  
483 Subcortical brain volume differences in participants with attention deficit hyperactivity  
484 disorder in children and adults: a cross-sectional mega-analysis. *The Lancet Psychiatry*  
485 [Internet]. 2017 Apr [cited 2019 Oct 28];4(4):310–9. Available from:  
486 <http://www.ncbi.nlm.nih.gov/pubmed/28219628>  
487 21. Hulvershorn LA, Cullen K, Anand A. Toward dysfunctional connectivity: a review of  
488 neuroimaging findings in pediatric major depressive disorder. *Brain Imaging Behav*  
489 [Internet]. 2011 Dec 8 [cited 2019 Oct 28];5(4):307–28. Available from:  
490 <http://link.springer.com/10.1007/s11682-011-9134-3>  
491 22. Schumann G, Loth E, Banaschewski T, Barbot A, Barker G, Büchel C, et al. The  
492 IMAGEN study: reinforcement-related behaviour in normal brain function and  
493 psychopathology. *Mol Psychiatry* [Internet]. 2010 Dec 19 [cited 2019 Oct  
494 28];15(12):1128–39. Available from: <http://www.ncbi.nlm.nih.gov/pubmed/21102431>  
495 23. Saunders JB, Aasland OG, Babor TF, de la Fuente JR, Grant M. Development of the  
496 Alcohol Use Disorders Identification Test (AUDIT): WHO Collaborative Project on Early  
497 Detection of Persons with Harmful Alcohol Consumption--II. *Addiction* [Internet]. 1993  
498 Jun [cited 2019 Oct 28];88(6):791–804. Available from:  
499 <http://doi.wiley.com/10.1111/j.1360-0443.1993.tb02093.x>  
500 24. Goodman R. The Strengths and Difficulties Questionnaire: A Research Note. *J Child*  
501 *Psychol Psychiatry* [Internet]. 1997 Jul 1 [cited 2019 Oct 28];38(5):581–6. Available  
502 from: <http://doi.wiley.com/10.1111/j.1469-7610.1997.tb01545.x>  
503 25. Goodman A, Lamping DL, Ploubidis GB. When to use broader internalising and  
504 externalising subscales instead of the hypothesised five subscales on the Strengths and  
505 Difficulties Questionnaire (SDQ): data from British parents, teachers and children. *J*  
506 *Abnorm Child Psychol* [Internet]. 2010 Nov 10 [cited 2019 Oct 28];38(8):1179–91.  
507 Available from: <http://link.springer.com/10.1007/s10802-010-9434-x>  
508 26. Kirby KN, Maraković NN. Delay-discounting probabilistic rewards: Rates decrease as  
509 amounts increase. *Psychon Bull Rev* [Internet]. 1996 Mar 1 [cited 2019 Oct 28];3(1):100–  
510 4. Available from: <http://link.springer.com/10.3758/BF03210748>  
511 27. Wild K V., Musser ED. The Cambridge Neuropsychological Test Automated Battery in  
512 the Assessment of Executive Functioning. In: *Handbook of Executive Functioning*  
513 [Internet]. New York, NY: Springer New York; 2014 [cited 2019 Oct 28]. p. 171–90.  
514 Available from: [http://link.springer.com/10.1007/978-1-4614-8106-5\\_11](http://link.springer.com/10.1007/978-1-4614-8106-5_11)  
515 28. Faridi N, Karama S, Burgaleta M, White MT, Evans AC, Fonov V, et al. Neuroanatomical  
516 correlates of behavioral rating versus performance measures of working memory in  
517 typically developing children and adolescents. *Neuropsychology* [Internet]. 2015 Jan  
518 [cited 2019 Oct 28];29(1):82–91. Available from:  
519 <http://www.ncbi.nlm.nih.gov/pubmed/25000324>  
520 29. Ashburner J, Friston KJ. Voxel-Based Morphometry—The Methods. *Neuroimage*.  
521 2000;821(11):805–21.  
522 30. Kaplan BA, Lemley SM, Reed DD, Jarmolowicz DP. 21- and 27-Item Monetary Choice  
523 Questionnaire Automated Scorers. 2014 [cited 2019 Oct 28]; Available from:  
524 <https://kuscholarworks.ku.edu/handle/1808/15424>  
525 31. Wileyto EP, Audrain-McGovern J, Epstein LH, Lerman C. Using logistic regression to  
526 estimate delay-discounting functions. *Behav Res Methods Instrum Comput* [Internet].

- 527 2004 Feb [cited 2019 Oct 28];36(1):41–51. Available from:  
528 <http://www.ncbi.nlm.nih.gov/pubmed/15190698>
- 529 32. Imai K, Keele L, Tingley D, Yamamoto T. Causal Mediation Analysis Using R. In  
530 Springer, New York, NY; 2010 [cited 2019 Oct 28]. p. 129–54. Available from:  
531 [http://link.springer.com/10.1007/978-1-4419-1764-5\\_8](http://link.springer.com/10.1007/978-1-4419-1764-5_8)
- 532 33. Casey BJ, Jones RM, Hare TA. The adolescent brain. *Ann N Y Acad Sci* [Internet]. 2008  
533 Mar [cited 2019 Oct 28];1124(1):111–26. Available from:  
534 <http://doi.wiley.com/10.1196/annals.1440.010>
- 535 34. Taylor A, Wright HR, Lack LC. Sleeping-in on the weekend delays circadian phase and  
536 increases sleepiness the following week. *Sleep Biol Rhythms* [Internet]. 2008 Jul [cited  
537 2019 Oct 28];6(3):172–9. Available from: [http://doi.wiley.com/10.1111/j.1479-](http://doi.wiley.com/10.1111/j.1479-8425.2008.00356.x)  
538 [8425.2008.00356.x](http://doi.wiley.com/10.1111/j.1479-8425.2008.00356.x)
- 539 35. Coutinho JF, Gonçalves OF, Maia L, Fernandes Vasconcelos C, Perrone-McGovern K,  
540 Simon-Dack S, et al. Differential activation of the default mode network in jet lagged  
541 individuals. *Chronobiol Int* [Internet]. 2015 Feb 2 [cited 2019 Oct 28];32(1):143–9.  
542 Available from: <http://www.tandfonline.com/doi/full/10.3109/07420528.2014.955187>
- 543 36. Cho K. Chronic “jet lag” produces temporal lobe atrophy and spatial cognitive deficits.  
544 *Nat Neurosci* [Internet]. 2001 Jun [cited 2019 Oct 28];4(6):567–8. Available from:  
545 [http://www.nature.com/articles/nn0601\\_567](http://www.nature.com/articles/nn0601_567)
- 546 37. Rosenberg J, Jacobs HIL, Maximov II, Reske M, Shah NJ. Chronotype differences in  
547 cortical thickness: grey matter reflects when you go to bed. *Brain Struct Funct* [Internet].  
548 2018 Sep 15 [cited 2019 Oct 28];223(7):3411–21. Available from:  
549 <http://link.springer.com/10.1007/s00429-018-1697-y>
- 550 38. Alexander WH, Brown JW. Medial prefrontal cortex as an action–outcome predictor. *Nat*  
551 *Neurosci* [Internet]. 2011 Oct 18 [cited 2019 Oct 28];14(10):1338–44. Available from:  
552 <http://www.nature.com/articles/nn.2921>
- 553 39. Bootzin RR, Epstein DR. Understanding and Treating Insomnia. *Annu Rev Clin Psychol*  
554 [Internet]. 2011 Apr 27 [cited 2019 Oct 28];7(1):435–58. Available from:  
555 <http://www.ncbi.nlm.nih.gov/pubmed/17716026>
- 556 40. Colman I, Wadsworth MEJ, Croudace TJ, Jones PB. Forty-year psychiatric outcomes  
557 following assessment for internalizing disorder in adolescence. *Am J Psychiatry* [Internet].  
558 2007 Jan [cited 2019 Oct 28];164(1):126–33. Available from:  
559 <http://psychiatryonline.org/doi/abs/10.1176/ajp.2007.164.1.126>
- 560 41. Colman I, Murray J, Abbott RA, Maughan B, Kuh D, Croudace TJ, et al. Outcomes of  
561 conduct problems in adolescence: 40 year follow-up of national cohort. *BMJ* [Internet].  
562 2009 Jan 8 [cited 2019 Oct 28];338(jan08 2):a2981. Available from:  
563 <http://www.bmj.com/cgi/doi/10.1136/bmj.a2981>
- 564 42. Daugherty JR, Brase GL. Taking time to be healthy: Predicting health behaviors with  
565 delay discounting and time perspective. *Pers Individ Dif* [Internet]. 2010 Jan [cited 2019  
566 Oct 28];48(2):202–7. Available from:  
567 <https://linkinghub.elsevier.com/retrieve/pii/S0191886909004188>  
568

Figure 1. Later wake up time during the weekend was associated with reduced grey matter volumes in the A) left amygdala and B) mPFC

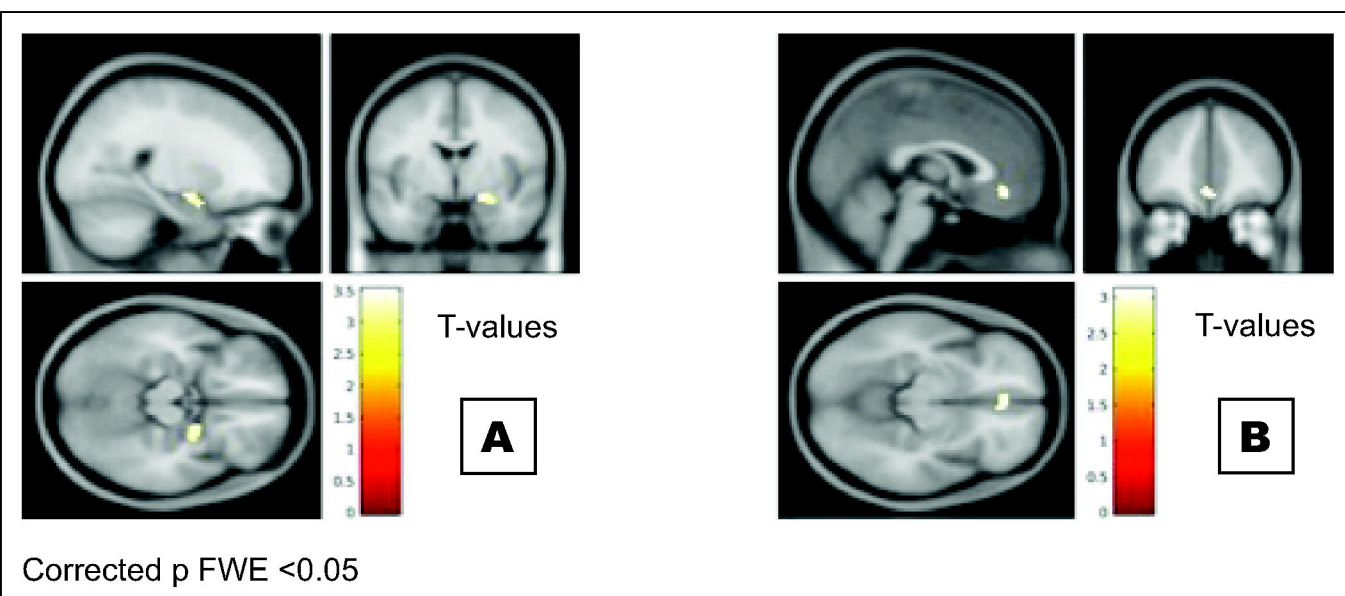

Source: https://www.biorxiv.org/content/10.1101/645184v2.full.pdf
